# Supplementary material for: Multilevel Multivariate Modelling of The Effect of Gender and Patient Co-morbidity on Spherocylindrical Refractive Outcome Following Cataract Surgery
Source: Research Square preprint supplement (doi:10.21203/rs.3.rs-136536/v1), 2021-01-22
Supplement: Supplementary file 1 [file 00974771b738ac9f3ae3a19f.docx]

**Table 4** Population-average of the Error of Expected Refractive Outcome (EERO) among women and men aged 77 years with no ocular co-morbidities, and population-average difference in EERO between patients with posterior capsular rupture plus another specified ocular co-morbidity compared to patients without posterior capsular rupture nor the other specified ocular co-morbidity, all else being equal.

|  | **Posterior mean/ mean difference** | **95% Credible Interval** | |
| --- | --- | --- | --- |
| Population-average of EERO in reference patients |  |  |  |
| Women aged 77 years with no ocular co-morbidities£ | -0.30+0.45x4 | -0.32+0.46×5, -0.29+0.45×4 | |
| Men aged 77 years with no ocular co-morbidities£ | -0.13+0.40x5 | -0.14+0.40x5, -0.12+0.40x4 | |
| Population-average difference in EERO |  |  |  |
| Posterior capsular rupture and brunescent/white mature cataract | -0.38+0.050x71 | -0.42+0.066x64, -0.34+0.040x83 | |
| Posterior capsular rupture and pseudoexfoliation/phacodonesis | -0.30+0.023x75 | -0.36+0.045x59, -0.26+0.024x110 | |
| Posterior capsular rupture and high myopia | -0.45+0.064x66 | -0.49+0.082x61, -0.41+0.049x74 | |
| Posterior capsular rupture and uveitis/synechiae | -0.40+0.039x46 | -0.46+0.069x46, -0.34+0.0089x46 | |

Results reported as compound numbers: sphere cylinder × axis. £: With a subjective refraction observed within 3 months of operation.
